# Supplementary material
Source: Springer Nature journal article supplement (https://www.springermedizin.de/resource/supplementary/12889_2012_4082_MOESM2_ESM.pdf/9491272)
Supplement: MOESM2 [file 9491272]

**Table 2: Medication and Blood pressure characteristic of respondents, GUH, Northwest Ethiopia, 2011.**

| <b>Variables</b>                         | <b>Frequency</b> | <b>Percent</b> |
|------------------------------------------|------------------|----------------|
| <b>Number of co morbidity</b>            |                  |                |
| None                                     | 182              | 47.4           |
| 1                                        | 170              | 44.3           |
| >= 2                                     | 32               | 8.3            |
| <b>Blood Pressure:</b>                   |                  |                |
| Controlled                               | 179              | 46.6           |
| Uncontrolled                             | 205              | 53.4           |
| <b>Number of drugs:</b>                  |                  |                |
| One                                      | 154              | 40.1           |
| Two                                      | 174              | 45.3           |
| Three and above                          | 56               | 14.6           |
| <b>Dosage frequency:</b>                 |                  |                |
| Once daily                               | 179              | 46.6           |
| BID                                      | 196              | 51.0           |
| TID and above                            | 9                | 2.3            |
| <b>Number of pills per day:</b>          |                  |                |
| One pill                                 | 112              | 29.2           |
| Two pills                                | 99               | 25.8           |
| Three pills                              | 101              | 26.3           |
| Four and above pills                     | 72               | 18.8           |
| <b>Who covered the cost of the drug?</b> |                  |                |
| Myself                                   | 128              | 33.3           |
| Family                                   | 12               | 3.2            |
| Free                                     | 229              | 59.6           |
| Employer organization                    | 15               | 3.9            |
| <b>Duration of Treatment in yrs:</b>     |                  |                |
| 0.25 - 1 yrs                             | 109              | 28.4           |
| 2 - 4 yrs                                | 135              | 35.2           |
| 5 - 7 yrs                                | 55               | 14.3           |
| 8 - 10 yrs                               | 42               | 10.9           |
| ≥ 11 yrs                                 | 43               | 11.2           |
